# Supplementary material for: Evolutionary dynamics of multidrug resistant Salmonella enterica serovar 4,[5],12:i:- in Australia
Source: PubMed Central journal article supplement (PMC8352879; doi:10.1038/s41467-021-25073-w), 2021-08-09
Supplement: 41467_2021_25073_MOESM3_ESM.pdf [file 41467_2021_25073_MOESM3_ESM.pdf]

## **Description of Additional Supplementary Files**

**Supplementary Data 1:** Data on the ST34 *Salmonella* 4,[5],12:i:- isolates included in this study

**Supplementary Data 2:** Details of Australian complete genomes.
